# Supplementary material for: Shared Decision-Making in Colorectal Cancer Screening for Older Adults: A Secondary Analysis of a Cluster Randomized Clinical Trial
Source: PubMed Central journal article supplement (PMC11344228; doi:10.1001/jamanetworkopen.2024.29645), 2024-08-23
Supplement: jamanetwopen-e2429645-s003.pdf [file jamanetwopen-e2429645-s003.pdf]

## Data Sharing Statement

Sepucha. Shared Decision-Making in Colorectal Cancer Screening for Older Adults. *JAMA Netw Open*. Published August 23, 2024. doi:10.1001/jamanetworkopen.2024.29645

### Data

**Data available:** Yes

**Data types:** Deidentified participant data, Data dictionary

**How to access data:** After the study results have been published, de-identified data sets and code books will be deposited in an open access service, ICPSR (<https://www.icpsr.umich.edu/icpsrweb/>).

**When available:** With publication

### Supporting Documents

**Document types:** None

### Additional Information

**Who can access the data:** Anyone requesting the data who meets the requirements for ICPSR (<https://www.icpsr.umich.edu/icpsrweb/>) will be able to access the data.

**Types of analyses:** Anyone requesting the data who meets the requirements for ICPSR (<https://www.icpsr.umich.edu/icpsrweb/>) will be able to access the data and perform analyses.

**Mechanisms of data availability:** The data will be available through ICPSR (<https://www.icpsr.umich.edu/icpsrweb/>).
